# Supplementary material
Source: PubMed Central journal article supplement (PMC7504924)
Supplement: supp_RA120.014150_160539_2_supp_570546_qdywn7.pdf [file supp_RA120.014150_160539_2_supp_570546_qdywn7.pdf]

# A heme-binding domain in neuronal voltage-gated potassium channels

Mark J Burton<sup>‡,\*</sup>, Joel Cresser-Brown<sup>§,\*</sup>, Morgan Thomas<sup>‡</sup>, Nicola Portolano<sup>‡</sup>, Jaswir Basran<sup>¶</sup>, Samuel L. Freeman<sup>§</sup>, Hanna Kwon<sup>§</sup>, Andrew R. Bottrill<sup>†</sup>, Manuel J Llansola-Portoles<sup>□</sup>, Andrew A. Pascal<sup>□</sup>, Rebekah Jukes-Jones<sup>§§</sup>, Tatyana Chernova<sup>§§</sup>, Ralf Schmid<sup>¶</sup>, Noel W Davies<sup>¶</sup>, Nina M Storey<sup>¶</sup>, Pierre Dorlet<sup>¶</sup>, Peter C E Moody<sup>¶</sup>, John S Mitcheson<sup>¶</sup> and Emma L Raven<sup>§,1</sup>

<sup>‡</sup> Department of Chemistry and Leicester Institute of Structural and Chemical Biology, University of Leicester, Leicester, LE1 7RH, England.

<sup>§</sup> School of Chemistry, University of Bristol, Cantock's Close, Bristol, BS8 1TS, UK.

<sup>¶</sup> Department of Molecular and Cell Biology and Leicester Institute of Structural and Chemical Biology, University of Leicester, Leicester, LE1 9HN, England.

<sup>†</sup> Protein Nucleic Acid Chemistry Laboratory, Hodgkin Building, University of Leicester, LE1 9HN, UK.

<sup>□</sup> Université Paris-Saclay, CEA, CNRS, Institute for Integrative Biology of the Cell (I2BC), 91198, Gif-sur-Yvette, France.

<sup>§§</sup> MRC Toxicology Unit, University of Cambridge, Lancaster Rd, Leicester, LE1 9HN, UK.

<sup>¶</sup> CNRS, Aix Marseille Univ, BIP, Marseille, France.

<sup>1</sup> To whom correspondence should be addressed. School of Chemistry, University of Bristol, Cantock's Close, Bristol, BS8 1TS, UK. Telephone: +44 (0)117 9287647; E-mail: [emma.raven@bristol.ac.uk](mailto:emma.raven@bristol.ac.uk).

## EXPERIMENTAL PROCEDURES

*Heme-agarose affinity purification and mass spectrometry of neuronal lysates.* Primary cortical neurons were prepared either from male and female 14-day-old fetuses of the BALB/c mouse strain bred in-house. The isolated neocortex of embryos were gently dissociated to release the neurons, which were washed twice in Neurobasal medium (GIBCO, Carlsbad, CA) supplemented with 10% foetal calf serum. Cell suspensions were plated on poly-L-lysine-coated 35-mm plates at a density of  $1 \times 10^6$  cells per dish as previously (1). After attachment of the cells, the plating medium was changed to serum-free culture medium containing 96% (v/v) Neurobasal medium (GIBCO), GlutaMAX (2 mM), 2% B-27 supplement (GIBCO/Invitrogen, Paisley, UK), streptomycin (100  $\mu$ g/ml) and penicillin (100 U/ml). Viability of the cells was estimated by the trypan blue exclusion assay and typically was around 85%. After 5 days, cytosine arabinoside (10  $\mu$ M) was added to the culture medium for 3 days to stop proliferation of glial cells or fibroblasts. The cells were grown in a humidified incubator at 37° C (95% room air/5% CO<sub>2</sub>). After 12 days in culture, neurons displayed fully developed network of projections.

Neuronal lysates were screened for possible heme-binding proteins using a modification of a previously published heme-agarose affinity (2). Binding of target proteins to heme-agarose was performed as previously (3), with modifications, Fig. S1B, that minimise pulling down proteins that bind to the heme-agarose resin non-specifically. The affinity chromatography method utilizes an agarose matrix with immobilized heme (immobilization is accomplished through the propionic acid group of heme (4), Fig. S1A) to identify and purify proteins that bind to the beads. However, heme can bind non-specifically to proteins. Thus, an additional step was included where a solution of hemin was added as a competitor (Fig. S1B). Briefly, 100  $\mu$ l of heme-agarose (Sigma-Aldrich) was washed three times in 1 ml of 100 mM Na/K phosphate (pH 6.0) and 200 mM NaCl, and centrifuged at  $750 \times g$  for 5 min. Heme-agarose was incubated with 200  $\mu$ l of cell lysate at room temperature for 2 hours with gentle mixing. To remove unbound proteins the beads were washed three times with the same buffer used for the binding step, pellets containing the beads were harvested by centrifugation ( $750 \times g$ , 5 min) and the supernatant discarded. The agarose-heme beads with proteins bound after the first incubation were re-suspended in binding buffer and 100 nM hemin (a competitor) was added to the suspension. The second incubation was performed for 2 hours at room temperature with gentle mixing. During this stage, proteins were displaced from the heme-agarose beads as they bind to hemin in solution. Finally, the beads were removed by centrifugation and the supernatant containing candidate heme-bound proteins was analyzed by SDS-PAGE followed by mass spectrometry. Using this approach, only proteins that were displaced from the agarose beads to bind specifically to the (heme) competitor (*i.e.* more likely to be *bona fide* heme binding proteins) were subjected to proteomics analysis, Fig. S1C. Sepharose 4B (Sigma-Aldrich), which is an agarose bead without heme attached, was used as a non-specific binding control.

For mass spectrometry analyses, SDS-PAGE gels were sliced, de-stained, dehydrated, and digested with trypsin (Promega) either overnight at 30 °C or for 3 hours at 37 °C. Tryptic peptides were extracted using 0.2% trifluoroacetic acid, solubilized in 5% formic acid, and analyzed by LC-MS/MS using a nanoLC system (CapLC, Waters) interfaced to a QToF hybrid mass spectrometer (Waters). Mass spectrometry data were acquired using Masslynx 4.0 with automatic precursor ion selection for double and highly charged ions. Peptide spectra were processed by Proteinlynx software identified through comparison to the nonredundant SwissProt database (<ftp://us.expasy.org/databases/>) using the MASCOT program (Matrix Science). Protein and peptide identification was validated using Scaffold (Proteome Software Inc.). Proteins were identified using the following settings: 50% peptide and 50% protein probabilities with convincing spectra (stringency settings were low due to the expected low abundance of proteins in the sample from the binding assay with free heme as a competitor).

*Data Availability.* The mass spectrometry proteomics data have been deposited to the ProteomeXchange Consortium via the PRIDE (5) partner repository with the dataset identifier PXD019887 and 10.6019/PXD019887.

**Table S1. Axial ligation (light blue), Soret and Q-band absorption maxima and high-frequency vibrational modes (grey) found in various heme-binding PAS domain proteins.**

| Protein     | Axial ligands        | Ferric   |               | Fe(II)-CO |          | v <sub>4</sub> | v <sub>3</sub>       | v <sub>2</sub> | Ref.      |
|-------------|----------------------|----------|---------------|-----------|----------|----------------|----------------------|----------------|-----------|
|             |                      | Soret    | Q bands       | Soret     | Q bands  |                |                      |                |           |
| hERG3(PAS)  | Cys/His              | 420, 370 | 517, 550, 652 | 421       | 540, 569 | 1373           | 1502                 | 1553<br>1585   | This work |
| Clock PAS-A | Unknown              | 412      | 535,565       | 420       | 540, 570 | 1373           | 1502                 | 1583           | (6)       |
| NPAS2-PASA  | Cys/His              | 412      | 538           | 420       | 530, 568 | 1373           | 1474<br>1490<br>1504 |                | (7,8)     |
| NPAS2 PAS-B | His/?                | 419      | 536           | 420       | 536, 571 | 1373           | 1468<br>1502         | 1550<br>1581   | (9)       |
| mPer2 PAS-A | Cys/?                | 421      | 536           | 420       | 539 565  | 1372           | 1470<br>1501         | 1553<br>1585   | (10)      |
| mPer2 PAS-B | Unknown              | 412      | 536, 564, 630 | -         |          | -              |                      |                | (11)      |
| EcDOS PAS   | His/H <sub>2</sub> O | 416      | 530, 564      | 423       | 540, 570 | 1370           | 1496                 | 1581           | (12-14)   |
| FixLN       | His                  | 412      | 543, 579, 604 | 425       | 545, 576 | 1372           | 1490                 |                | (15)      |

**Table S2. Crystallographic data and refinement statistics, values in parentheses are for the outer shell.**

| Data collection                          | hERG3 PAS domain                       |
|------------------------------------------|----------------------------------------|
| Space group                              | P4 <sub>3</sub> 2 <sub>1</sub> 2       |
| Cell dimension<br>a, b, c (Å) α β γ (°)  | 32.78, 32.78, 200.68, 90.0, 90.0, 90.0 |
| Resolution (Å)                           | 66.9-1.39 (1.43-1.39)                  |
| CC(1/2)                                  | 0.999 (0.766)                          |
| I/σI                                     | 13.93 (1.05)                           |
| Completeness (%)                         | 100.0 (100.0)                          |
| Multiplicity                             | 12.0 (12.3)                            |
| <b>Refinement</b>                        |                                        |
| No. reflections (free)                   | 23378 (1208)                           |
| R <sub>work</sub> /R <sub>free</sub> (%) | 18.2 / 23.4                            |
| Wilson B-factor (Å <sup>2</sup> )        | 11.6                                   |
| Overall B-factors                        | 35.0                                   |
| <b>R.m.s deviations</b>                  |                                        |
| Bond lengths (Å)                         | 0.0197                                 |
| Bond angles (°)                          | 2.234                                  |
| <b>Ramachandran</b>                      |                                        |
| Most favoured (%)                        | 99.0                                   |
| Allowed (%)                              | 1.0                                    |

**Table S3. Final cycle refinement geometry restraints and weights in Refmac5 (16).**

|                                             |                           |
|---------------------------------------------|---------------------------|
| <b>Sigma</b>                                |                           |
| Bonding distances                           | 1.0                       |
| Bond Angles                                 | 1.0                       |
| Planar Groups                               | 1.0 (all) 1.0(Main Chain) |
| Chiral Centres                              | 1.0                       |
| <b>Non-bonded contacts (Å)</b>              | 1.0 (overall)             |
| Sigma for simple VdW                        | 0.2                       |
| Sigma for VdW through torsion               | 0.2                       |
| Sigma for H-bond                            | 0.2                       |
| Sigma for metal-ion                         | 0.2                       |
| Sigma for DUMMY and other atom              | 0.3                       |
| Distance for donor-acceptor + (vdW1 +vdW2 ) | -0.3                      |
| Distance for acceptor H + (vdw1)            | 0.1                       |
| VDW distance through torsion + (vdW1+vdW2)  | -0.3                      |
| Distance for DUMMY-others + (vdW1+vdW2)     | -0.7                      |
| <b>Torsion angles weight</b>                | 1.0                       |
| <b>Thermal Factors weight</b>               | 1.0                       |
| Main chain bond (1-2 neighbour)             | 1.5Å <sup>2</sup>         |
| Main chain angle (1-3 neighbour)            | 2.0Å <sup>2</sup>         |
| Side chain bond                             | 3.0Å <sup>2</sup>         |
| Side chain angle                            | 4.5Å <sup>2</sup>         |

## REFERENCES

- Chernova, T., Nicotera, P., and Smith, A. G. (2006) Heme deficiency is associated with senescence and causes suppression of N-methyl-D-aspartate receptor subunits expression in primary cortical neurons. *Mol Pharmacol* **69**, 697-705
- Otto, B. R., van Dooren, S. J., Nuijens, J. H., Luirink, J., and Oudega, B. (1998) Characterization of a hemoglobin protease secreted by the pathogenic Escherichia coli strain EB1. *The Journal of experimental medicine* **188**, 1091-1103
- Lee, B. G. (1992) Isolation of an Outer Membrane Hemin-Binding Protein of *Haemophilus Influenzae* Type B. *Infection and Immunity* **60**, 810-816
- Byrnes, J. J., Downey, K. M., Esserman, L., and So, A. G. (1975) Mechanism of hemin inhibition of erythroid cytoplasmic DNA polymerase. *Biochemistry* **14**, 796-799
- Perez-Riverol, Y., Csordas, A., Bai, J., Bernal-Llinares, M., Hewapathirana, S., Kundu, D. J., Inuganti, A., Griss, J., Mayer, G., Eisenacher, M., Perez, E., Uszkoreit, J., Pfeuffer, J., Sachsenberg, T., Yilmaz, S., Tiwary, S., Cox, J., Audain, E., Walzer, M., Jarnuczak, A. F., Ternent, T., Brazma, A., and Vizcaino, J. A. (2019) The PRIDE database and related tools and resources in 2019: improving support for quantification data. *Nucleic acids research* **47**, D442-D450
- Lukat-Rodgers, G. S., Correia, C., Botuyan, M. V., Mer, G., and Rodgers, K. R. (2010) Heme-based sensing by the mammalian circadian protein CLOCK. *Inorg Chem* **49**, 6349-6365
- Mukaiyama, Y., Uchida, T., Sato, E., Sasaki, A., Sato, Y., Igarashi, J., Kurokawa, H., Sagami, I., Kitagawa, T., and Shimizu, T. (2006) Spectroscopic and DNA-binding characterization of the isolated heme-bound basic helix-loop-helix-PAS-A domain of neuronal PAS protein 2 (NPAS2), a transcription activator protein associated with circadian rhythms. *FEBS J* **273**, 2528-2539
- Uchida, T., Sato, E., Sato, A., Sagami, I., Shimizu, T., and Kitagawa, T. (2005) CO-dependent activity-controlling mechanism of heme-containing CO-sensor protein, neuronal PAS domain protein 2. *J Biol Chem* **280**, 21358-21368

9. Koudo, R., Kurokawa, H., Sato, E., Igarashi, J., Uchida, T., Sagami, I., Kitagawa, T., and Shimizu, T. (2005) Spectroscopic characterization of the isolated heme-bound PAS-B domain of neuronal PAS domain protein 2 associated with circadian rhythms. *FEBS J* **272**, 4153-4162
10. Kitanishi, K., Igarashi, J., Hayasaka, K., Hikage, N., Saiful, I., Yamauchi, S., Uchida, T., Ishimori, K., Shimizu, T. (2008) Heme-Binding Characteristics of the Isolated PAS-A Domain of Mouse Per2, a Transcriptional Regulatory Factor Associated with Circadian Rhythms. *Biochemistry* **47**, 6157-6168
11. Hayasaka, K., Kitanishi, K., Igarashi, J., and Shimizu, T. (2011) Heme-binding characteristics of the isolated PAS-B domain of mouse Per2, a transcriptional regulatory factor associated with circadian rhythms. *Biochim Biophys Acta* **1814**, 326-333
12. Sato, A., Sasakura, Y., Sugiyama, S., Sagami, I., Shimizu, T., Mizutani, Y., and Kitagawa, T. (2002) Stationary and time-resolved resonance Raman spectra of His77 and Met95 mutants of the isolated heme domain of a direct oxygen sensor from *Escherichia coli*. *J Biol Chem* **277**, 32650-32658
13. Tomita, T., Gonzalez, G., Chang, A. L., Ikeda-Saito, M., Gilles-Gonzalez, M-A. (2002) A Comparative Resonance Raman Analysis of Heme-Binding PAS Domains: Heme Iron Coordination Structures of the *BjFixL*, *AxPDEA1*, *EcDOS*, and *MtDos* Proteins. *Biochemistry* **41**, 4819-4826
14. Delgado-Nixon, V. M., Gonzalez, G., Gilles-Gonzalez, M-A. (2000) Dos, a Heme-Binding PAS Protein from *Escherichia coli*, Is a Direct Oxygen Sensor. *Biochemistry* **39**, 2685-2691
15. Lukat-Rodgers, G. S., Rexine, J.L., Rodgers, K.R. (1998) Heme Speciation in Alkaline Ferric FixL and Possible Tyrosine Involvement in the Signal Transduction Pathway for Regulation of Nitrogen Fixation. *Biochemistry* **37**, 13543-13552
16. Murshudov, G. N., Vagin, A. A., and Dodson, E. J. (1997) Refinement of macromolecular structures by the maximum-likelihood method. *Acta Crystallogr D Biol Crystallogr* **53**, 240-255

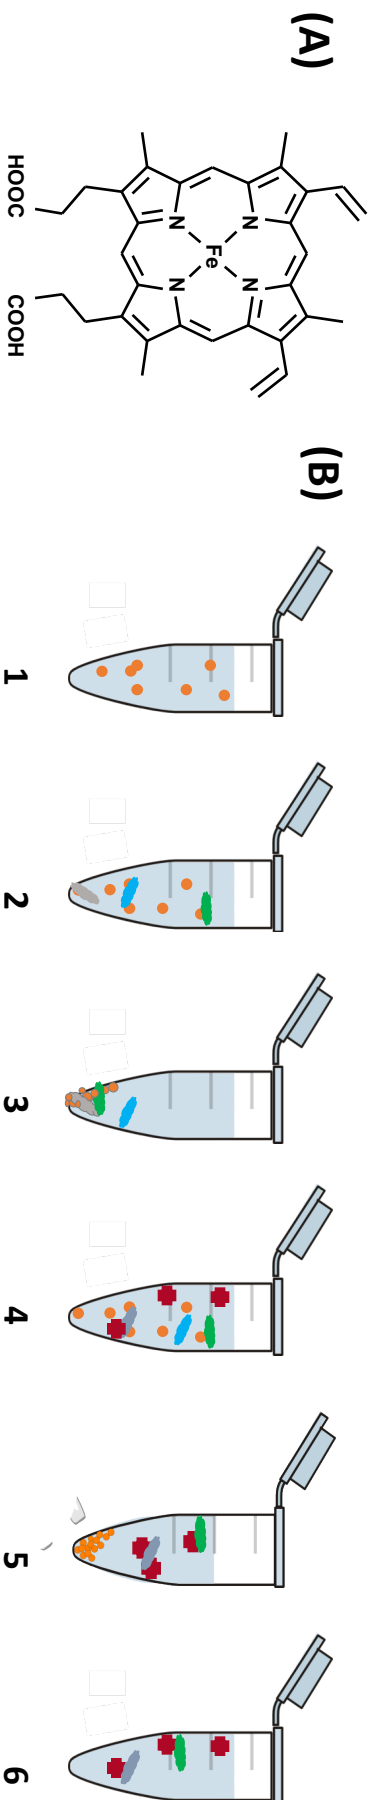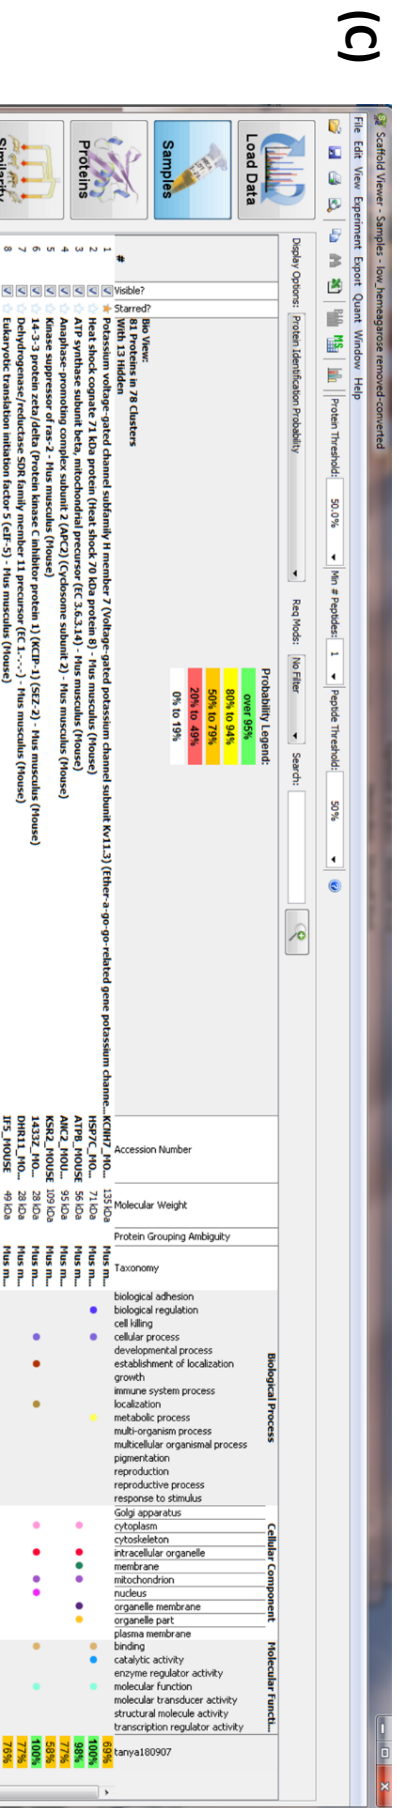

**Figure S1. (A)** The structure of iron protophyirin IX (heme). **(B)** Schematic representation of the affinity-chromatography approach. (1) Neuronal lysate is added to heme-agarose beads (shown in orange). (2) Proteins from the lysate (shown as coloured disks) bind to heme-agarose during the first incubation; (3) The beads are washed and the supernatant, containing proteins that are not bound to the agarose, is removed; (4) The beads are re-suspended in binding buffer and a solution of hemin (100 nM, shown as red cross) is added to compete for proteins bound to the agarose; (5) The beads are removed by centrifugation; (6) The supernatant, containing heme-bound proteins, is used for proteomics analysis by mass spectrometry. **(C)** Screenshot of the mass spectrometry data obtained, showing hERG3 identified among the proteins that bound free heme (competitor) in the affinity-chromatography assay described in (A).

**(A)**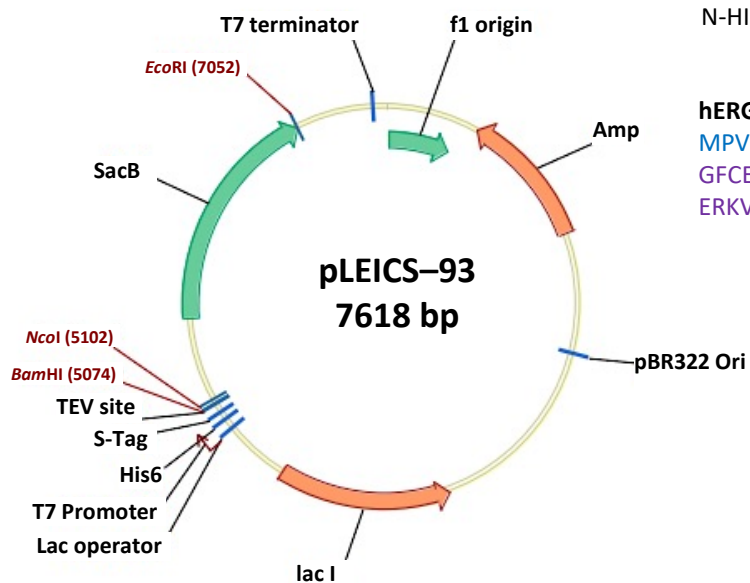**N-terminal tag:**N-HIS<sub>6</sub>/S: HHHHHH-SSGLVPRGSGM-S-PDLGTGS-ENLYFQ/GA**hERG3(Cap + PAS):**

MPVRRGHVAPQNTFLGTIIRKFEGQNKKFIANARVQNCALIIYCN  
 GFCEMTGFSRPDVMQKPCTCDFLHGPETKRHDIAQIAQALLGSE  
 ERKVEVTTYHKNGSTFICNTHIIPVKNQEGVAMMFIINFEYVTDN

**(B)**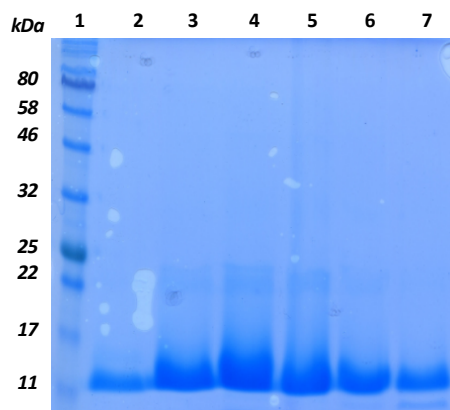**(C)**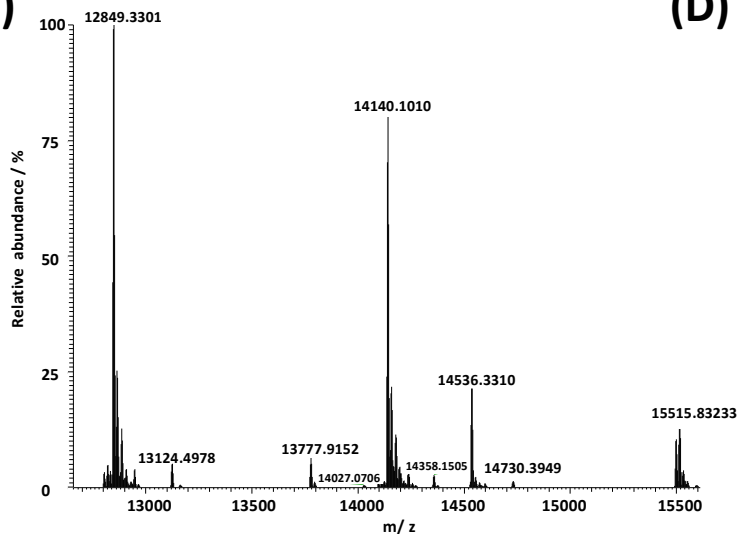**(D)**

| Observed MW of hERG3(PAS) | Missing residues from the hERG3(PAS) crystal | Calculated MW of fragments |
|---------------------------|----------------------------------------------|----------------------------|
| 15515.8323                | None                                         |                            |
| 14730.3949                | GAMPVRR                                      | 14729.8633                 |
| 14536.3310                | GAMPVRRGH                                    | 14535.6700                 |
| 14358.1505                | GAMPVRRGHVA                                  | 14365.4587                 |
| 14140.1010                | GAMPVRRGHVAPQ                                | 14140.2112                 |
| 14027.0706                | GAMPVRRGHVAPQN                               | 14026.1073                 |
| 13777.9152                | GAMPVRRGHVAPQNTF                             | 13777.8256                 |
| 13124.4978                | GAMPVRRGHVAPQNTFLG TIIR                      | 13124.0023                 |
| 12849.3301                | GAMPVRRGHVAPQNTFLG TIIRKF                    | 12848.6515                 |

**Figure S2.** (A) Map of pLEICS-93 vector used for the expression of hERG3 PAS domain (residues 1-135) in *E. coli* BL21(DE3). The sequences of the N-terminal tags and hERG3 are indicated on the right. (B) SDS-PAGE of the fractions (lanes 2-7) from a 10/300 Superdex 200 gel filtration column, after elution of hERG3(PAS). Lane 1 shows molecular-mass markers (in kDa). The target protein is located around 15 kDa. (C) LC-MS spectrum of a hERG3(PAS) solubilised hERG3(PAS) crystal used for collection of X-ray data, showing the presence of several components (in (D)). These components arise from different lengths of the N-terminal Cap domain (see Fig. 1).
